# Supplementary material
Source: Springer Nature journal article supplement (https://www.springermedizin.de/resource/supplementary/12889_2007_1217_MOESM1_ESM.pdf/9502714)
Supplement: MOESM1 [file 9502714]

## Additional file 1: Questions of the inquiry

### Czeck version

|                                                                                                        |                                                                                                                                                                                                                                                                                                                                           |
|--------------------------------------------------------------------------------------------------------|-------------------------------------------------------------------------------------------------------------------------------------------------------------------------------------------------------------------------------------------------------------------------------------------------------------------------------------------|
| <b>Introducing statement:</b><br><b>Lišky žijí v současnosti více a více i ve městech a vesnicích.</b> |                                                                                                                                                                                                                                                                                                                                           |
| 1. Question                                                                                            | Domníváte se, že je správné, že lišky žijí v městských oblastech?<br><i>Possible Answers: velmi dobře / spíše dobře / spíše špatně / velmi špatně</i>                                                                                                                                                                                     |
| 2. Question                                                                                            | Slyšel jste někdy o tasemnici liščí (měchožilu větveném)?<br><i>Possible Answers: Ano / Ne</i>                                                                                                                                                                                                                                            |
| 3. Question*                                                                                           | Domníváte se, že jste byl přiměřeně informován o tasemnici liščí (měchožilu větveném)?<br><i>Possible Answers: Ano / Ne / Nevím</i>                                                                                                                                                                                                       |
| 4. Question*                                                                                           | Domníváte se, že tasemnice liščí (měchožil větvený) pro Vás představuje zdravotní riziko?<br><i>Possible Answers: Ano – velké riziko / Ano – malé riziko / Ne - zcela bez rizika</i>                                                                                                                                                      |
| 5. Question*                                                                                           | Víte jak se můžete chránit proti vzniku onemocnění způsobovaném tasemnicí liščí (měchožilem větveným) ?<br><i>Possible Answers: Léčit lišky / Pravidelně odčervovat psy a kočky / Nesbírat a nejíst lesní plody / Mýt potraviny před jejich konzumací / Vařit potraviny před jejich konzumací / Vyvarovat se kontaktu s liščím trusem</i> |

### French version

|                                                                                                                                 |                                                                                                                                                                                                                                                                                                                                    |
|---------------------------------------------------------------------------------------------------------------------------------|------------------------------------------------------------------------------------------------------------------------------------------------------------------------------------------------------------------------------------------------------------------------------------------------------------------------------------|
| <b>Introducing statement :</b><br><b>De nos jours, les renards vivent de plus en plus dans les villages et dans les villes.</b> |                                                                                                                                                                                                                                                                                                                                    |
| 1. Question                                                                                                                     | Pensez-vous que la présence de renard dans ces zones urbaines soit :<br><i>Possible Answers: Une très bonne chose / une plutôt bonne chose / une plutôt mauvaise chose / une très mauvaise chose</i>                                                                                                                               |
| 2. Question                                                                                                                     | Avez-vous déjà entendu parler de l'échinocoque alvéolaire, autrement appelé ténia du renard ?<br><i>Possible Answers: Oui / No</i>                                                                                                                                                                                                 |
| 3. Question*                                                                                                                    | Pensez-vous être suffisamment informé sur le ténia du renard ?<br><i>Possible Answers: Oui / Non / Je ne sais pas</i>                                                                                                                                                                                                              |
| 4. Question*                                                                                                                    | Pensez-vous que le ténia du renard représente un risque pour votre santé ?<br><i>Possible Answers: Oui, un grand risque / Oui, un faible risque / Non, aucun risque</i>                                                                                                                                                            |
| 5. Question*                                                                                                                    | Savez-vous comment vous protéger contre le ténia du renard ?<br><i>Possible Answers: Traiter les renards / Purger les chats et les chiens régulièrement / Ne pas ramasser ni manger de baies / Laver les aliments avant consommation / Cuire les aliments avant consommation / Eviter le contact avec les excréments de renard</i> |

### German version

|                                                                                                                            |                                                                                                                                                                                                                                                         |
|----------------------------------------------------------------------------------------------------------------------------|---------------------------------------------------------------------------------------------------------------------------------------------------------------------------------------------------------------------------------------------------------|
| <b>Introducing statement</b><br><b>Füchse leben heute immer mehr auch in besiedelten Gebieten, in Dörfern und Städten.</b> |                                                                                                                                                                                                                                                         |
| 1. Question                                                                                                                | Finden Sie es gut, dass Füchse in besiedelten Gebieten leben?<br><i>Possible Answers: sehr gut / eher gut / eher nicht gut / überhaupt nicht gut</i>                                                                                                    |
| 2. Question                                                                                                                | Haben Sie schon einmal von Fuchsbandwurm gehört?<br><i>Possible Answers: Ja / Nein</i>                                                                                                                                                                  |
| 3. Question*                                                                                                               | Fühlen Sie sich ausreichend über Fuchsbandwurm informiert?<br><i>Possible Answers: Ja / Nein / Weiss nicht</i>                                                                                                                                          |
| 4. Question*                                                                                                               | Ist der Fuchsbandwurm ein Risiko für ihre Gesundheit? Würden Sie sagen, dass es<br><i>Possible Answers: ein grosses Risiko ist / ein geringes Risiko ist / kein Risiko ist</i>                                                                          |
| 5. Question*                                                                                                               | Wie kann man sich gegen Fuchsbandwurm schützen?<br><i>Possible Answers: Behandeln von Füchsen / Hunde und Katzen entwurmen / Keine wildwachsenden Beeren essen / Waschen von Lebensmitteln / Kochen von Lebensmitteln / Kontakt mit Fuchskot meiden</i> |

\*Questions 3 – 5 were only asked to people that answered question 2 with yes.
